# Supplementary material for: Ecophysiological Aspects and sxt Genes Expression Underlying Induced Chemical Defense in STX-Producing Raphidiopsis raciborskii (Cyanobacteria) against the Zooplankter Daphnia gessneri
Source: MDPI journal article supplement (doi:10.3390/toxins13060406), 2021-06-08
Supplement: s1 [file s1]

# Supplementary Materials: Ecophysiological Aspects and *sxt* Genes Expression Underlying Induced Chemical Defense in STX-Producing *Raphidiopsis raciborskii* (Cyanobacteria) Against the Zooplankter *Daphnia gessneri*

Mauro C. P. Vilar, Thiago F. C. P. Rodrigues, Luan O. Silva, Ana Beatriz F. Pacheco, Aloysio S. Ferrão-Filho and Sandra M. F. O. Azevedo

**Table S1.** Results of the two-way ANOVA for differences in total saxitoxins biovolume quota of *Raphidiopsis raciborskii* T3 exposed (infochemicals) and not exposed (control) to *Daphnia gessneri* over 6 days of incubation. ns = no significant differences.

| STXs Biovolume Quota | SS     | Df | MS     | F                    | P       |
|----------------------|--------|----|--------|----------------------|---------|
| Time                 | 0.5828 | 3  | 0.1943 | $F_{(3,12)} = 31.02$ | <0.0001 |
| Infochemicals        | 0.0308 | 1  | 0.0308 | $F_{(1,4)} = 7.524$  | ns      |
| Interaction          | 0.134  | 3  | 0.0447 | $F_{(3,12)} = 7.133$ | <0.01   |
| Subjects (matching)  | 0.0164 | 4  | 0.0041 | $F_{(4,12)} = 0.654$ | ns      |
| Residual             | 0.0751 | 12 | 0.0063 |                      |         |

**Table S2.** Results of the post hoc Bonferroni's comparison test for differences in biovolume toxicity relative to STX analogues produced by *Raphidiopsis raciborskii* T3 exposed (infochemicals) and not exposed (control) to *Daphnia gessneri* over 6 days of incubation. ns = no significant differences. CI = confidence interval.

| CONTROL—INFOCHEMICALS<br>(biovolume toxicity) | Mean Difference | 95%CI of Differences | P      |
|-----------------------------------------------|-----------------|----------------------|--------|
| Time (d <sup>-1</sup> )                       |                 |                      |        |
| 0                                             | 0               | -0.1737–0.1737       | ns     |
| 2                                             | -0.03           | -0.2037–0.1437       | ns     |
| 4                                             | -0.06667        | -0.1071–0.2404       | ns     |
| 6                                             | -0.3233         | -0.4971–0.1496       | <0.001 |

**Table S3.** Results of the two-way ANOVA for differences in the relative expression of *sxtI* and *sxtU* by *Raphidiopsis raciborskii* T3 exposed (infochemicals) and not exposed (control) to *Daphnia gessneri* over 6 days of incubation. ns= no significant differences.

| <i>sxtI</i> | SS    | Df | MS     | F                    | P     |
|-------------|-------|----|--------|----------------------|-------|
| Time        | 1.307 | 3  | 0.4356 | $F_{(3,12)} = 8.172$ | <0.01 |

| Infochemicals       | 0.5646 | 1  | 0.5646 | $F_{(1,4)} = 8.588$  | <0.05   |
|---------------------|--------|----|--------|----------------------|---------|
| Interaction         | 1.621  | 3  | 0.5402 | $F_{(3,12)} = 10.13$ | <0.01   |
| Subjects (matching) | 0.263  | 4  | 0.0657 | $F_{(4,12)} = 1.233$ | ns      |
| Residual            | 0.6396 | 12 | 0.0533 |                      |         |
| <i>sxtU</i>         | SS     | Df | MS     | F                    | P       |
| Time                | 5.36   | 3  | 1.787  | $F_{(3,12)} = 137.7$ | <0.0001 |
| Infochemicals       | 2.237  | 1  | 2.237  | $F_{(1,4)} = 153.2$  | <0.001  |
| Interaction         | 3.335  | 3  | 1.112  | $F_{(3,12)} = 85.65$ | <0.0001 |
| Subjects (matching) | 0.0584 | 4  | 0.0146 | $F_{(4,12)} = 1.125$ | ns      |
| Residual            | 0.1557 | 12 | 0.0130 |                      |         |

**Table S4.** Results of the two-way ANOVA for differences in the biovolume growth curves and chlorophyll-a of *Raphidiopsis raciborskii* T3 exposed (infochemicals) and not exposed (control) to *Daphnia gessneri* over 6 days of incubation. ns= no significant differences.

| Control             | SS      | Df | MS      | F                     | P       |
|---------------------|---------|----|---------|-----------------------|---------|
| Time                | 0.2598  | 3  | 0.08661 | $F_{(3,60)} = 165.9$  | <0.0001 |
| Infochemicals       | 0.5474  | 9  | 0.06082 | $F_{(9,20)} = 107.5$  | <0.0001 |
| Interaction         | 0.05403 | 27 | 0.00200 | $F_{(27,60)} = 3.833$ | <0.0001 |
| Subjects (matching) | 0.01132 | 20 | 0.00056 | $F_{(20,60)} = 1.084$ | ns      |
| Residual            | 0.03132 | 60 | 0.00052 |                       |         |
| Infochemicals       | SS      | Df | MS      | F                     | P       |
| Time                | 0.2608  | 3  | 0.08695 | $F_{(3,60)} = 920.9$  | <0.0001 |
| Infochemicals       | 0.6307  | 9  | 0.07008 | $F_{(9,20)} = 627$    | <0.0001 |
| Interaction         | 0.07168 | 27 | 0.00265 | $F_{(27,60)} = 28.12$ | <0.0001 |
| Subjects (matching) | 0.00223 | 20 | 0.00011 | $F_{(20,60)} = 1.184$ | ns      |
| Residual            | 0.0057  | 60 | 0.00009 |                       |         |

**Table S5.** Efficiencies and standard curve parameters obtained by real-time qPCR analysis for the cyanobacterial *rpoC1*-, *sxtI*- and *sxtU*-specific primer sets.

| Target Gene                 | Strain                               | Efficiency | Slope  | Y-intercept | R <sup>2</sup> | Melting Temperature |
|-----------------------------|--------------------------------------|------------|--------|-------------|----------------|---------------------|
| Cyanobacterial <i>rpoC1</i> | <i>R. Raciborskii</i> T3 genomic DNA | 98.23      | −3.365 | 13.49       | 0.9794         | 60–95 °C            |

|                               |                                         |        |        |       |        |          |
|-------------------------------|-----------------------------------------|--------|--------|-------|--------|----------|
| Cyanobacterial<br><i>sxtI</i> | <i>R. Raciborskii</i> T3<br>genomic DNA | 107.18 | −3.161 | 16.27 | 1.0000 | 60–95 °C |
| Cyanobacterial<br><i>sxtU</i> | <i>R. Raciborskii</i> T3<br>genomic DNA | 107.52 | −3.154 | 15.43 | 0.9997 | 60–95 °C |

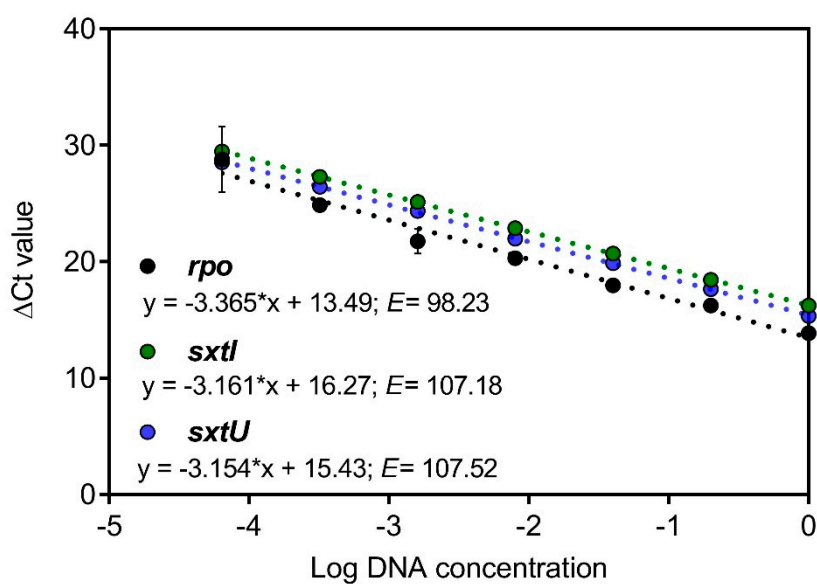

**Figure S1.** Standard curve and its linear equation for cyanobacterial *rpoC1*-, *sxtI*- and *sxtU*-specific primers.
